# Correction: How tetraspanins shape endothelial and leukocyte nano-architecture during inflammation

Jonas Franz, Marco Tarantola and Christoph Riethmüller

*Biochemical Society Transactions*, 2017, DOI: 10.1042/BST20170163

In the Ahead-of-Print version of this article published on 14 July 2017, one of the affiliations of the author Jonas Franz was not present. The correct affiliations for this author are:

- nAnostic Institute, Centre for Nanotechnology, Heisenbergstrasse 11, 48149 Münster, Germany
- Theoretical Neurophysics, Max Planck Institute for Dynamics and Self-Organization, Am Fassberg 17, 37077 Göttingen, Germany

The online article was corrected on 28 July 2017

Correction published:  
16 October 2017
